# Supplementary material
Source: Elsevier journal article supplement (https://www.sciencedirect.com/science/article/pii/S2255553619301004)
Supplement: mmc1 [file S2255553619301004:mmc1.pdf]

## Supplementary material

**Figure S1 - Flow chart of the pediatric literature search and study selection.**

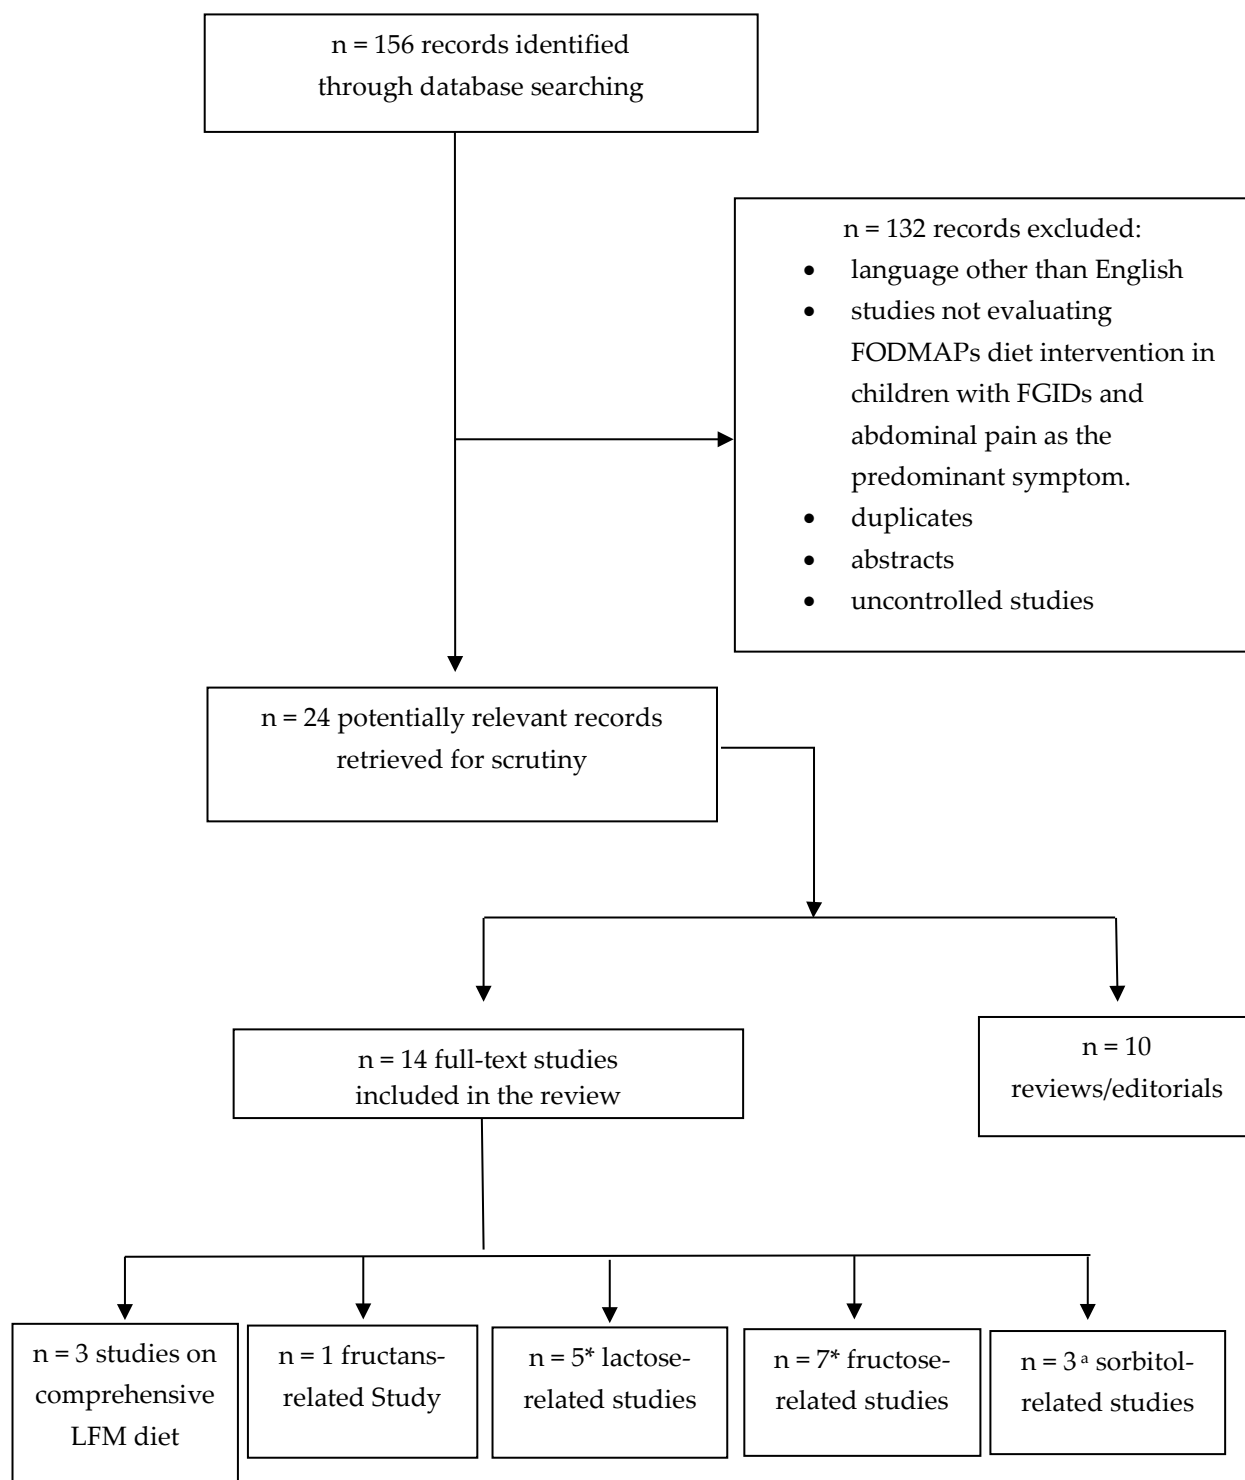

<sup>a</sup> Including studies evaluating multiple dietary treatments.
